# Supplementary material for: Characteristics, primary treatment, and survival of MDS/MPN with neutrophilia: a population-based study
Source: PubMed Central journal article supplement — Blood Adv. 2023 Nov 10;7(24):7554–63. doi: 10.1182/bloodadvances.2023011181 (PMC10761362; doi:10.1182/bloodadvances.2023011181), 2023-11-10
Supplement: BLOODA_ADV-2023-011181-mmc1.pdf [file BLOODA_ADV-2023-011181-mmc1.pdf]

## Table S1

**Table S1.** Baseline patient characteristics, 2001-2019

| Characteristics                         | Calendar period |      |                 |      | Total           |      |
|-----------------------------------------|-----------------|------|-----------------|------|-----------------|------|
|                                         | 2001-2013       |      | 2014-2019       |      |                 |      |
|                                         | No.             | (%)  | No.             | (%)  | No.             | (%)  |
| <b>Total No. of patients</b>            | <b>237</b>      |      | <b>110</b>      |      | <b>347</b>      |      |
| <b>Sex</b>                              |                 |      |                 |      |                 |      |
| Male                                    | 147             | (62) | 78              | (71) | 225             | (65) |
| Female                                  | 90              | (38) | 32              | (29) | 122             | (35) |
| <b>Age at diagnosis, years</b>          |                 |      |                 |      |                 |      |
| Median (IQR)                            | 71 (63-77)      |      | 73 (67-78)      |      | 72 (64-95)      |      |
| ≤65                                     | 77              | (32) | 22              | (20) | 99              | (29) |
| >65                                     | 160             | (68) | 88              | (80) | 248             | (71) |
| <b>First-line treatment</b>             |                 |      |                 |      |                 |      |
| Best supportive care only               | 66              | (28) | 33              | (30) | 99              | (29) |
| Anti-neoplastic therapy without alloSCT | 159             | (67) | 62              | (56) | 221             | (64) |
| Anti-neoplastic therapy with alloSCT    | 12              | (5)  | 15              | (14) | 27              | (8)  |
| <b>Death during follow-up</b>           | 207             | (87) | 92              | (84) | 299             | (86) |
| <b>Median follow-up, months (IQR)</b>   | 15.1 (4.4-36.1) |      | 16.8 (9.4-33.1) |      | 15.8 (5.3-33.9) |      |

Abbreviations: IQR, interquartile range; and alloSCT, allogeneic stem cell transplantation

**Table S2**

**Table S2.** Median overall survival and projected 1-, 5-, and 10-year overall survival according to baseline characteristics

| Characteristics                              | Median OS, months | 95% CI |      | 1-year OS | 95% CI |     | 5-year OS | 95% CI |     | 10-year OS | 95% CI |     |
|----------------------------------------------|-------------------|--------|------|-----------|--------|-----|-----------|--------|-----|------------|--------|-----|
| <b>Overall cohort</b>                        | 15.8              | 13.8   | 17.2 | 61%       | 56%    | 66% | 18%       | 14%    | 22% | 14%        | 10%    | 18% |
| <b>Demographics</b>                          |                   |        |      |           |        |     |           |        |     |            |        |     |
| Sex                                          |                   |        |      |           |        |     |           |        |     |            |        |     |
| Male                                         | 15.3              | 12.9   | 16.7 | 59%       | 52%    | 65% | 17%       | 12%    | 22% | 13%        | 8%     | 18% |
| Female                                       | 17.0              | 12.9   | 22.3 | 65%       | 56%    | 73% | 21%       | 14%    | 28% | 15%        | 9%     | 23% |
| Age, years                                   |                   |        |      |           |        |     |           |        |     |            |        |     |
| ≤65                                          | 25.3              | 16.1   | 41.9 | 71%       | 61%    | 79% | 38%       | 28%    | 47% | 35%        | 26%    | 45% |
| >65                                          | 14.3              | 12.2   | 16.1 | 57%       | 51%    | 63% | 10%       | 7%     | 14% | 5%         | 2%     | 8%  |
| Calendar period                              |                   |        |      |           |        |     |           |        |     |            |        |     |
| 2001-2013                                    | 15.1              | 12.5   | 17.1 | 59%       | 53%    | 65% | 19%       | 15%    | 25% | 15%        | 11%    | 20% |
| 2014-2019                                    | 16.7              | 14.7   | 19.5 | 65%       | 55%    | 73% | 14%       | 8%     | 22% |            | NA     |     |
| <b>Cytogenetics (2014-2019 cohort)</b>       |                   |        |      |           |        |     |           |        |     |            |        |     |
| Normal karyotype                             | 17.2              | 14.7   | 25.2 | 64%       | 53%    | 73% | 17%       | 9%     | 27% |            | NA     |     |
| Abnormal karyotype                           | 13.8              | 4.1    | 17.5 | 53%       | 26%    | 74% | 7%        | 0%     | 26% |            | NA     |     |
| <b>Molecular genetics (2014-2019 cohort)</b> |                   |        |      |           |        |     |           |        |     |            |        |     |
| Epigenetic mutations <sup>a</sup>            | 15.3              | 11.2   | 27.9 | 65%       | 44%    | 80% |           | NA     |     |            | NA     |     |
| Signaling mutations <sup>b</sup>             | 18.5              | 11.2   | NR   | 79%       | 47%    | 93% | 32%       | 9%     | 58% |            | NA     |     |
| Splicing mutations <sup>c</sup>              | 11.2              | 9.2    | NR   | 50%       | 21%    | 74% |           | NA     |     |            | NA     |     |
| Number of mutations                          |                   |        |      |           |        |     |           |        |     |            |        |     |
| No mutations                                 | 15.6              | 11.3   | 23.9 | 60%       | 45%    | 71% | 13%       | 5%     | 23% |            | NA     |     |
| One mutation                                 | 19.4              | 15.5   | 36.5 | 86%       | 63%    | 95% | 8%        | 1%     | 27% |            | NA     |     |
| Two mutations                                | 18.5              | 9.1    | NR   | 82%       | 45%    | 95% |           | NA     |     |            | NA     |     |
| Three or more mutations                      | 12.7              | 9.4    | 27.9 | 56%       | 30%    | 76% |           | NA     |     |            | NA     |     |

Abbreviations: OS, overall survival; CI, confidence interval; NA, not applicable (due to no observations) and NR, not reached

<sup>a</sup>Includes mutations in *ASXL1*, *TET2*, *EZH2*, and *DNMT3A*.

<sup>b</sup>Includes mutations in *JAK2*, *CALR*, *KIT*, *IDH2*, and *KRAS/NRAS*.

<sup>c</sup>Includes mutation in *SRSF2*.

## Table S3

**Table S3.** Cox regression analysis, 2001-2019

| Characteristics                          | Model w/o adjustment for primary therapy |             |          | Model w/ adjustment for primary therapy |             |          |
|------------------------------------------|------------------------------------------|-------------|----------|-----------------------------------------|-------------|----------|
|                                          | HR                                       | 95% CI      | <i>P</i> | HR                                      | 95% CI      | <i>P</i> |
| <b>Sex</b>                               |                                          |             |          |                                         |             |          |
| Male                                     | 1                                        | (ref)       |          | 1                                       | (ref)       |          |
| Female                                   | 0.86                                     | 0.67 - 1.12 | 0.269    | 0.87                                    | 0.67 - 1.13 | 0.304    |
| <b>Age at diagnosis</b>                  |                                          |             |          |                                         |             |          |
| ≤65 years                                | 1                                        | (ref)       |          | 1                                       | (ref)       |          |
| >65 years                                | 2.07                                     | 1.53 - 2.81 | <0.001   | 1.85                                    | 1.34 - 2.55 | <0.001   |
| <b>Calendar period</b>                   |                                          |             |          |                                         |             |          |
| 2001-2013                                | 1                                        | (ref)       |          | 1                                       | (ref)       |          |
| 2014-2019                                | 0.79                                     | 0.60 - 1.03 | 0.081    | 0.85                                    | 0.64 - 1.11 | 0.235    |
| <b>Primary therapy</b>                   |                                          |             |          |                                         |             |          |
| Best supportive care only                |                                          |             |          | 0.83                                    | 0.63 - 1.10 | 0.201    |
| Anti-neoplastic therapy without alloHSCT |                                          |             |          | 1                                       | (ref)       |          |
| AlloHSCT                                 |                                          |             |          | 0.51                                    | 0.26 - 0.97 | 0.039    |

Abbreviations: w/o, without; 'w/, with; HR, hazard ratio; CI, confidence interval; and alloHSCT, allogeneic hematopoietic stem cell transplantation.

**Table S4**

**Table S4.** Cox regression, 2014-2019

| Characteristics                           | Univariable |                           |              | Multivariable (full model) |                           |              | Multivariable (forward selection) |                           |              |
|-------------------------------------------|-------------|---------------------------|--------------|----------------------------|---------------------------|--------------|-----------------------------------|---------------------------|--------------|
|                                           | HR          | 95% CI                    | P            | HR                         | 95% CI                    | P            | HR                                | 95% CI                    | P            |
| <b>Demographics</b>                       |             |                           |              |                            |                           |              |                                   |                           |              |
| Female sex                                | <b>0.58</b> | <b>0.34</b> - <b>1.00</b> | <b>0.048</b> | 0.58                       | 0.30 - 1.12               | 0.102        |                                   |                           |              |
| Age >65 years                             | <b>2.72</b> | <b>1.38</b> - <b>5.36</b> | <b>0.004</b> | <b>2.22</b>                | <b>1.05</b> - <b>4.70</b> | <b>0.036</b> | <b>2.55</b>                       | <b>1.29</b> - <b>5.03</b> | <b>0.007</b> |
| <b>Blood and bone marrow features</b>     |             |                           |              |                            |                           |              |                                   |                           |              |
| Hemoglobin ≤10 g/dL                       | <b>1.85</b> | <b>1.14</b> - <b>3.01</b> | <b>0.013</b> | <b>3.18</b>                | <b>1.61</b> - <b>6.26</b> | <b>0.001</b> | <b>1.68</b>                       | <b>1.03</b> - <b>2.74</b> | <b>0.037</b> |
| Platelets ≤100 x 10 <sup>9</sup> L        | 1.29        | 0.78 - 2.15               | 0.324        | 0.80                       | 0.41 - 1.57               | 0.512        |                                   |                           |              |
| Circulating blasts in PB                  | 1.38        | 0.73 - 2.60               | 0.318        | 1.20                       | 0.52 - 2.76               | 0.667        |                                   |                           |              |
| BM blast ≥5%                              | 1.24        | 0.69 - 2.20               | 0.471        | 0.86                       | 0.39 - 1.87               | 0.700        |                                   |                           |              |
| BM fibrosis present                       | 1.55        | 0.78 - 3.09               | 0.210        | 1.70                       | 0.76 - 3.81               | 0.201        |                                   |                           |              |
| <b>Cytogenetic abnormalities present</b>  | 1.78        | 0.97 - 3.26               | 0.061        | 1.55                       | 0.76 - 3.16               | 0.233        |                                   |                           |              |
| <b>Molecular genetics</b>                 |             |                           |              |                            |                           |              |                                   |                           |              |
| Epigenetic mutations present <sup>a</sup> | 0.91        | 0.53 - 1.57               | 0.730        | 0.71                       | 0.23 - 2.22               | 0.559        |                                   |                           |              |
| Signaling mutations present <sup>b</sup>  | 0.66        | 0.31 - 1.37               | 0.264        | 0.90                       | 0.34 - 2.37               | 0.836        |                                   |                           |              |
| Splicing mutations present <sup>c</sup>   | 1.27        | 0.63 - 2.59               | 0.505        | 1.80                       | 0.68 - 4.82               | 0.238        |                                   |                           |              |
| Number of mutations                       |             |                           |              |                            |                           |              |                                   |                           |              |
| No mutations                              | 1           | (ref)                     |              | 1                          | (ref)                     |              |                                   |                           |              |
| One mutation                              | 0.86        | 0.49 - 1.51               | 0.592        | 0.60                       | 0.27 - 1.35               | 0.215        |                                   |                           |              |
| Two mutations                             | 0.77        | 0.34 - 1.74               | 0.528        | 1.02                       | 0.35 - 2.96               | 0.967        |                                   |                           |              |
| Three or more mutations                   | 0.92        | 0.46 - 1.86               | 0.822        | 0.86                       | 0.18 - 4.18               | 0.850        |                                   |                           |              |

Abbreviations: HR, hazard ratio; CI, confidence interval; PB, peripheral blood; and BM, bone marrow

Bold estimates indicate those statistically significant with a *P* of < 0.05

<sup>a</sup>Includes mutations in *ASXL1*, *TET2*, *EZH2*, and *DNMT3A*

<sup>b</sup>Includes mutations in *JAK2*, *CALR*, *KIT*, *IDH2*, and *KRAS/NRAS*

<sup>c</sup>Includes mutation in *SRSF2*.

**Table S5****Table S5.** Baseline patient characteristics of recipients of an alloHSCT, 2014-2019

| Characteristics                      | 2014-2019 cohort |              |
|--------------------------------------|------------------|--------------|
|                                      | No.              | (%)          |
| <b>Total No. of patients</b>         | <b>15</b>        | <b>(100)</b> |
| <b>Demographics</b>                  |                  |              |
| Sex                                  |                  |              |
| Male                                 | 11               | (73)         |
| Female                               | 4                | (27)         |
| Age, years                           |                  |              |
| Median (IQR)                         | 58               | (54-66)      |
| ≤65                                  | 11               | (73)         |
| >65                                  | 4                | (27)         |
| <b>Blood counts, median (IQR)</b>    |                  |              |
| Hemoglobin, g/dL                     | 10.6             | (8.1-13.9)   |
| Platelets, x 10 <sup>9</sup> L       | 160              | (85-264)     |
| Neutrophils, x 10 <sup>9</sup> L     | 26.5             | (23.2-60.0)  |
| Monocytosis (>1 x 10 <sup>9</sup> L) | 4                | (27)         |
| Blasts, % <sup>a</sup>               | 1                | (1-7)        |
| <b>Bone marrow features</b>          |                  |              |
| Blast data available, n/N (%)        | 13/15            | (87%)        |
| Median (IQR), %                      | 3                | (1-5)        |
| <5%                                  | 8                | (62)         |
| ≥5%                                  | 5                | (38)         |
| Fibrosis data available, n/N (%)     | 13/15            | (87%)        |
| Fibrosis present                     | 11               | (85)         |
| <b>Cytogenetics</b>                  |                  |              |
| Available                            | 15               | (100)        |
| Normal karyotype                     | 14               | (14)         |
| Abnormal karyotype <sup>b</sup>      | 1                | (1)          |
| Trisomy <sup>b</sup>                 | 1                | (1)          |
| <b>Molecular genetics</b>            |                  |              |
| Available                            | 15               | (100)        |
| ASXL1 mutation                       | 2                | (13)         |
| SETBP1 mutation                      | 3                | (20)         |
| SRSF2 mutation                       | 2                | (13)         |
| CSFR3 mutation                       | 2                | (13)         |
| JAK2 mutation                        | 3                | (20)         |
| TET2 mutation                        | 2                | (13)         |
| RUNX1 mutation                       | 0                | (0)          |
| EZH2 mutation                        | 0                | (0)          |
| Other mutations <sup>c</sup>         | 4                | (27)         |
| Number of mutations                  |                  |              |
| No mutations                         | 6                | (40)         |
| One mutation                         | 3                | (20)         |
| Two mutations                        | 3                | (20)         |
| Three or more mutations              | 3                | (20)         |
| <b>Death during follow-up</b>        | 92               | (613)        |
| Median follow-up, months (IQR)       | 28.7             | (16.1-49.8)  |

Abbreviations: IQR, interquartile range; and alloSCT, allogeneic stem cell transplantation.

<sup>a</sup>Missing in 1 patient

<sup>b</sup>Abnormal karyotype includes trisomy 13

<sup>c</sup>Includes patients with the following mutations: KIT (n=1), CEPBA (n=1), NPM1 (n=1), and ETNK1 mutation (n=1). Of note, a patient can harbour several mutations.

**Figure S1**

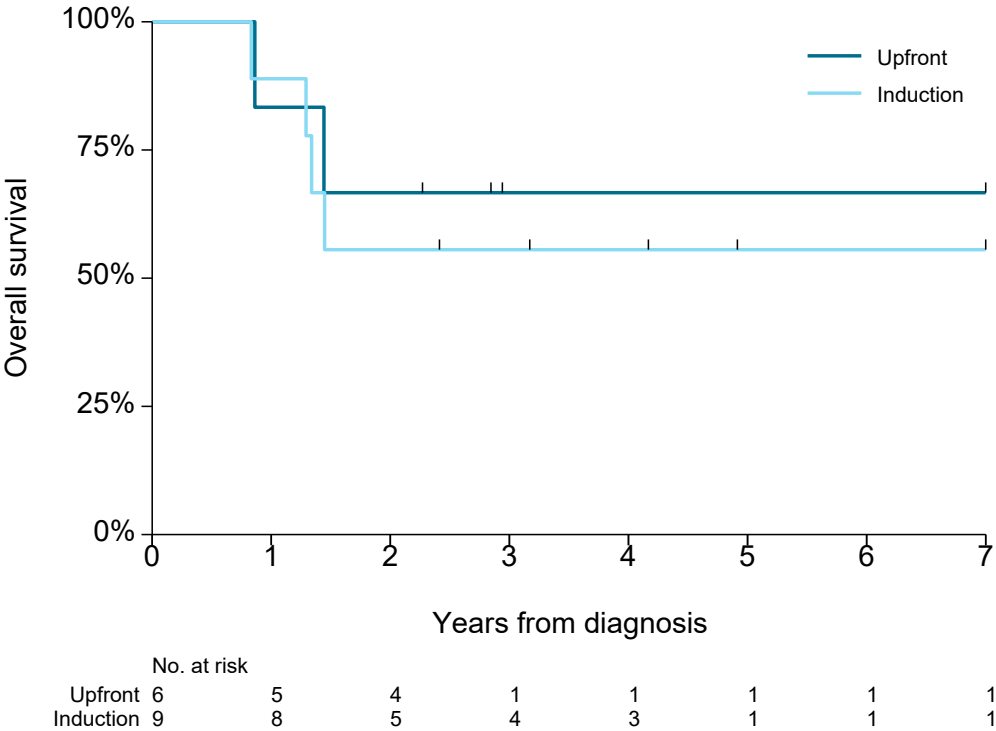

**Overall survival of patients with MDS/MPN with neutrophilia in the Netherlands, after alloHSCT 2001-2019.**

The figure shows the overall survival of patients with MDS/MPN with neutrophilia diagnosed during 2001-2019 according to induction regimen (upfront versus induction therapy)
